# Supplementary material for: Anion-controlled structural motif in one-dimensional coordination networks via cooperative weak noncovalent interactions
Source: Royal Society of Chemistry journal article supplement (doi:10.1039/c2ce25554e), 2012-01-01
Supplement: c2ce25554e.pdf [file c2ce25554e.pdf]

## Electronic Supplementary Information

### Anion-controlled structural motif in one-dimensional coordination networks *via* cooperative weak noncovalent interactions

*Behrouz Notash, Nasser Safari\* and Hamid Reza Khavasi*

*Chemistry Department, Shahid Beheshti University, G. C., Evin, Tehran 1983963113, Iran*

\*To whom correspondence should be addressed

*Tel.: +98 21 29902886; Fax: +98 21 22431661*

*E-mail address: [n-safari@cc.sbu.ac.ir](mailto:n-safari@cc.sbu.ac.ir) (N. Safari)*

**Table S1.** Crystal data and structure refinement for **1**.

|                                                     |                                                                                                                                       |
|-----------------------------------------------------|---------------------------------------------------------------------------------------------------------------------------------------|
| Identification code                                 | (1)                                                                                                                                   |
| Empirical formula                                   | C <sub>22</sub> H <sub>18</sub> Cl <sub>4</sub> Hg <sub>2</sub> N <sub>6</sub>                                                        |
| Formula weight                                      | 909.40                                                                                                                                |
| Temperature                                         | 293(2) K                                                                                                                              |
| Wavelength                                          | 0.71073 Å                                                                                                                             |
| Crystal system, space group                         | Monoclinic, <i>P</i> 2 <sub>1</sub> / <i>c</i>                                                                                        |
| Unit cell dimensions                                | <i>a</i> = 11.582(2) Å    alpha = 90 [°]<br><i>b</i> = 15.457(3) Å    beta = 92.69(3) [°]<br><i>c</i> = 14.730(3) Å    gamma = 90 [°] |
| Volume                                              | 2634.1(9) Å <sup>3</sup>                                                                                                              |
| Z, Calculated density                               | 4, 2.293 Mg/m <sup>3</sup>                                                                                                            |
| Absorption coefficient                              | 12.071 mm <sup>-1</sup>                                                                                                               |
| F(000)                                              | 1680                                                                                                                                  |
| Crystal size                                        | 0.17 × 0.12 × 0.12 mm                                                                                                                 |
| Theta range for data collection                     | 1.76 to 29.27 [°]                                                                                                                     |
| Limiting indices                                    | -15 ≤ <i>h</i> ≤ 15, -21 ≤ <i>k</i> ≤ 19, -15 ≤ <i>l</i> ≤ 20                                                                         |
| Reflections collected / unique                      | 20628 / 7103 [ <i>R</i> (int) = 0.0671]                                                                                               |
| Completeness to theta = 29.27                       | 98.8 %                                                                                                                                |
| Absorption correction                               | Numerical                                                                                                                             |
| Max. and min. transmission                          | 0.233 and 0.190                                                                                                                       |
| Refinement method                                   | Full-matrix least-squares on F <sup>2</sup>                                                                                           |
| Data / restraints / parameters                      | 7103 / 0 / 307                                                                                                                        |
| Goodness-of-fit on F <sup>2</sup>                   | 1.155                                                                                                                                 |
| Final <i>R</i> indices [ <i>I</i> > 2σ( <i>I</i> )] | <i>R</i> 1 = 0.0609, <i>wR</i> 2 = 0.1001                                                                                             |
| <i>R</i> indices (all data)                         | <i>R</i> 1 = 0.1114, <i>wR</i> 2 = 0.1133                                                                                             |
| Largest diff. peak and hole                         | 1.730 and -1.790 e.Å <sup>-3</sup>                                                                                                    |

**Table S2.** Atomic coordinates ( $\times 10^4$ ) and equivalent isotropic displacement parameters ( $\text{\AA}^2 \times 10^3$ ) for **1**.  $U(\text{eq})$  is defined as one third of the trace of the orthogonalized  $U_{ij}$  tensor.

|       | x        | y         | z        | $U(\text{eq})$ |
|-------|----------|-----------|----------|----------------|
| Hg(1) | -1472(1) | 1478(1)   | 7768(1)  | 47(1)          |
| Hg(2) | 6871(1)  | -3522(1)  | 6662(1)  | 45(1)          |
| Cl(1) | -1469(4) | 1491(3)   | 6178(2)  | 87(1)          |
| Cl(2) | -2549(2) | 1392(2)   | 9088(2)  | 55(1)          |
| Cl(3) | 8006(2)  | -3587(2)  | 5376(2)  | 53(1)          |
| Cl(4) | 6894(3)  | -3479(2)  | 8276(2)  | 64(1)          |
| N(1)  | 5657(6)  | 5254(5)   | 6440(5)  | 37(2)          |
| N(2)  | 3230(7)  | 4222(6)   | 7499(6)  | 46(2)          |
| N(3)  | -112(6)  | 2599(6)   | 8244(6)  | 40(2)          |
| N(4)  | -166(6)  | 272(5)    | 8082(5)  | 38(2)          |
| N(5)  | 2988(7)  | -1439(7)  | 7127(6)  | 52(2)          |
| N(6)  | 5558(6)  | -2388(6)  | 6231(6)  | 41(2)          |
| C(1)  | 4774(8)  | 5076(7)   | 6972(7)  | 41(2)          |
| C(2)  | 5941(7)  | 4667(6)   | 5817(6)  | 38(2)          |
| C(3)  | 5359(8)  | 3893(7)   | 5709(7)  | 45(2)          |
| C(4)  | 4432(8)  | 3733(6)   | 6256(6)  | 40(2)          |
| C(5)  | 4128(8)  | 4339(6)   | 6879(7)  | 39(2)          |
| C(6)  | 2417(8)  | 3708(6)   | 7299(7)  | 38(2)          |
| C(7)  | 1513(7)  | 3497(8)   | 7937(7)  | 42(2)          |
| C(8)  | 1445(10) | 3895(8)   | 8768(8)  | 53(3)          |
| C(9)  | 580(10)  | 3638(8)   | 9329(8)  | 56(3)          |
| C(10) | -158(10) | 2999(8)   | 9047(8)  | 51(3)          |
| C(11) | 726(8)   | 2866(7)   | 7694(7)  | 42(2)          |
| C(12) | 694(8)   | 87(7)     | 7543(7)  | 44(2)          |
| C(13) | -281(8)  | -212(7)   | 8822(6)  | 38(2)          |
| C(14) | 445(8)   | -886(7)   | 9046(7)  | 44(2)          |
| C(15) | 1333(8)  | -1094(7)  | 8477(7)  | 40(2)          |
| C(16) | 1457(7)  | -593(7)   | 7705(7)  | 36(2)          |
| C(17) | 2355(8)  | -771(7)   | 7070(7)  | 42(2)          |
| C(18) | 3877(8)  | -1572(8)  | 6513(7)  | 45(2)          |
| C(19) | 3997(11) | -1141(10) | 5701(9)  | 74(4)          |
| C(20) | 4906(12) | -1321(11) | 5155(10) | 84(5)          |
| C(21) | 5688(8)  | -1953(7)  | 5477(7)  | 46(3)          |
| C(22) | 4666(8)  | -2202(6)  | 6736(7)  | 37(2)          |

**Table S3.** Bond lengths [Å] and angles [°] for **1**.

---

|              |           |
|--------------|-----------|
| Hg(1)-Cl(1)  | 2.341(3)  |
| Hg(1)-Cl(2)  | 2.363(2)  |
| Hg(1)-N(3)   | 2.423(8)  |
| Hg(1)-N(4)   | 2.432(8)  |
| Hg(2)-Cl(3)  | 2.358(2)  |
| Hg(2)-N(1)#1 | 2.372(7)  |
| Hg(2)-Cl(4)  | 2.378(3)  |
| Hg(2)-N(6)   | 2.387(9)  |
| N(1)-C(2)    | 1.342(12) |
| N(1)-C(1)    | 1.346(11) |
| N(1)-Hg(2)#2 | 2.372(7)  |
| N(2)-C(6)    | 1.257(12) |
| N(2)-C(5)    | 1.428(12) |
| N(3)-C(10)   | 1.338(13) |
| N(3)-C(11)   | 1.357(11) |
| N(4)-C(12)   | 1.333(11) |
| N(4)-C(13)   | 1.334(12) |
| N(5)-C(17)   | 1.266(14) |
| N(5)-C(18)   | 1.417(12) |
| N(6)-C(21)   | 1.313(13) |
| N(6)-C(22)   | 1.331(11) |
| C(1)-C(5)    | 1.365(14) |
| C(1)-H(1)    | 0.9300    |
| C(2)-C(3)    | 1.378(14) |
| C(2)-H(2)    | 0.9300    |
| C(3)-C(4)    | 1.394(12) |
| C(3)-H(3)    | 0.9300    |
| C(4)-C(5)    | 1.369(13) |
| C(4)-H(4)    | 0.9300    |
| C(6)-C(7)    | 1.476(12) |
| C(6)-H(6)    | 0.9300    |
| C(7)-C(11)   | 1.371(15) |
| C(7)-C(8)    | 1.376(16) |
| C(8)-C(9)    | 1.386(14) |
| C(8)-H(8)    | 0.9300    |
| C(9)-C(10)   | 1.358(16) |
| C(9)-H(9)    | 0.9300    |
| C(10)-H(10)  | 0.9300    |
| C(11)-H(11)  | 0.9300    |
| C(12)-C(16)  | 1.387(14) |
| C(12)-H(12)  | 0.9300    |
| C(13)-C(14)  | 1.370(14) |
| C(13)-H(13)  | 0.9300    |
| C(14)-C(15)  | 1.394(13) |
| C(14)-H(14)  | 0.9300    |
| C(15)-C(16)  | 1.389(14) |
| C(15)-H(15)  | 0.9300    |
| C(16)-C(17)  | 1.457(12) |
| C(17)-H(17)  | 0.9300    |

|                    |            |
|--------------------|------------|
| C(18)-C(22)        | 1.366(14)  |
| C(18)-C(19)        | 1.382(17)  |
| C(19)-C(20)        | 1.383(15)  |
| C(19)-H(19)        | 0.9300     |
| C(20)-C(21)        | 1.400(18)  |
| C(20)-H(20)        | 0.9300     |
| C(21)-H(21)        | 0.9300     |
| C(22)-H(22)        | 0.9300     |
| Cl(1)-Hg(1)-Cl(2)  | 148.13(13) |
| Cl(1)-Hg(1)-N(3)   | 104.6(2)   |
| Cl(2)-Hg(1)-N(3)   | 99.4(2)    |
| Cl(1)-Hg(1)-N(4)   | 99.6(2)    |
| Cl(2)-Hg(1)-N(4)   | 98.52(19)  |
| N(3)-Hg(1)-N(4)    | 95.9(3)    |
| Cl(3)-Hg(2)-N(1)#1 | 101.8(2)   |
| Cl(3)-Hg(2)-Cl(4)  | 145.51(10) |
| N(1)#1-Hg(2)-Cl(4) | 97.9(2)    |
| Cl(3)-Hg(2)-N(6)   | 101.0(2)   |
| N(1)#1-Hg(2)-N(6)  | 100.5(3)   |
| Cl(4)-Hg(2)-N(6)   | 102.8(2)   |
| C(2)-N(1)-C(1)     | 118.5(8)   |
| C(2)-N(1)-Hg(2)#2  | 118.1(6)   |
| C(1)-N(1)-Hg(2)#2  | 123.0(7)   |
| C(6)-N(2)-C(5)     | 119.3(9)   |
| C(10)-N(3)-C(11)   | 116.5(9)   |
| C(10)-N(3)-Hg(1)   | 122.3(6)   |
| C(11)-N(3)-Hg(1)   | 121.2(7)   |
| C(12)-N(4)-C(13)   | 118.2(9)   |
| C(12)-N(4)-Hg(1)   | 121.8(7)   |
| C(13)-N(4)-Hg(1)   | 120.0(6)   |
| C(17)-N(5)-C(18)   | 120.8(10)  |
| C(21)-N(6)-C(22)   | 119.0(9)   |
| C(21)-N(6)-Hg(2)   | 120.2(6)   |
| C(22)-N(6)-Hg(2)   | 120.7(7)   |
| N(1)-C(1)-C(5)     | 122.6(9)   |
| N(1)-C(1)-H(1)     | 118.7      |
| C(5)-C(1)-H(1)     | 118.7      |
| N(1)-C(2)-C(3)     | 122.1(8)   |
| N(1)-C(2)-H(2)     | 119.0      |
| C(3)-C(2)-H(2)     | 119.0      |
| C(2)-C(3)-C(4)     | 118.2(9)   |
| C(2)-C(3)-H(3)     | 120.9      |
| C(4)-C(3)-H(3)     | 120.9      |
| C(5)-C(4)-C(3)     | 119.7(9)   |
| C(5)-C(4)-H(4)     | 120.2      |
| C(3)-C(4)-H(4)     | 120.2      |
| C(1)-C(5)-C(4)     | 118.8(9)   |
| C(1)-C(5)-N(2)     | 116.9(9)   |
| C(4)-C(5)-N(2)     | 124.1(9)   |
| N(2)-C(6)-C(7)     | 122.4(10)  |
| N(2)-C(6)-H(6)     | 118.8      |
| C(7)-C(6)-H(6)     | 118.8      |
| C(11)-C(7)-C(8)    | 119.0(9)   |
| C(11)-C(7)-C(6)    | 118.3(10)  |
| C(8)-C(7)-C(6)     | 122.7(10)  |

|                   |           |
|-------------------|-----------|
| C(7)-C(8)-C(9)    | 118.4(11) |
| C(7)-C(8)-H(8)    | 120.8     |
| C(9)-C(8)-H(8)    | 120.8     |
| C(10)-C(9)-C(8)   | 119.3(11) |
| C(10)-C(9)-H(9)   | 120.4     |
| C(8)-C(9)-H(9)    | 120.4     |
| N(3)-C(10)-C(9)   | 123.7(9)  |
| N(3)-C(10)-H(10)  | 118.2     |
| C(9)-C(10)-H(10)  | 118.2     |
| N(3)-C(11)-C(7)   | 123.1(10) |
| N(3)-C(11)-H(11)  | 118.5     |
| C(7)-C(11)-H(11)  | 118.5     |
| N(4)-C(12)-C(16)  | 123.3(10) |
| N(4)-C(12)-H(12)  | 118.4     |
| C(16)-C(12)-H(12) | 118.4     |
| N(4)-C(13)-C(14)  | 122.6(9)  |
| N(4)-C(13)-H(13)  | 118.7     |
| C(14)-C(13)-H(13) | 118.7     |
| C(13)-C(14)-C(15) | 119.5(10) |
| C(13)-C(14)-H(14) | 120.3     |
| C(15)-C(14)-H(14) | 120.3     |
| C(16)-C(15)-C(14) | 118.2(10) |
| C(16)-C(15)-H(15) | 120.9     |
| C(14)-C(15)-H(15) | 120.9     |
| C(12)-C(16)-C(15) | 118.2(8)  |
| C(12)-C(16)-C(17) | 120.2(10) |
| C(15)-C(16)-C(17) | 121.6(9)  |
| N(5)-C(17)-C(16)  | 122.7(10) |
| N(5)-C(17)-H(17)  | 118.6     |
| C(16)-C(17)-H(17) | 118.6     |
| C(22)-C(18)-C(19) | 117.3(9)  |
| C(22)-C(18)-N(5)  | 116.6(10) |
| C(19)-C(18)-N(5)  | 126.0(10) |
| C(18)-C(19)-C(20) | 121.1(12) |
| C(18)-C(19)-H(19) | 119.4     |
| C(20)-C(19)-H(19) | 119.4     |
| C(19)-C(20)-C(21) | 116.1(12) |
| C(19)-C(20)-H(20) | 121.9     |
| C(21)-C(20)-H(20) | 121.9     |
| N(6)-C(21)-C(20)  | 123.1(9)  |
| N(6)-C(21)-H(21)  | 118.4     |
| C(20)-C(21)-H(21) | 118.4     |
| N(6)-C(22)-C(18)  | 123.1(10) |
| N(6)-C(22)-H(22)  | 118.4     |
| C(18)-C(22)-H(22) | 118.4     |

---

Symmetry transformations used to generate equivalent atoms:

#1 x,y-1,z #2 x,y+1,z

**Table S4.** Selected bond length (Å) and bond angles (°) for **1<sup>a</sup>**

|                   |            |                                |          |
|-------------------|------------|--------------------------------|----------|
| Hg(1)–N(3)        | 2.423(8)   | Hg(2)–N(1) <sup>#1</sup>       | 2.372(7) |
| Hg(1)–N(4)        | 2.432(8)   | Hg(2)–N(6)                     | 2.387(9) |
| Hg(1)–Cl(1)       | 2.341(3)   | Hg(2)–Cl(3)                    | 2.358(2) |
| Hg(1)–Cl(2)       | 2.363(2)   | Hg(2)–Cl(4)                    | 2.378(3) |
| C(6)–N(2)         | 1.257(12)  | C(17)–N(5)                     | 1.266(1) |
| Cl(1)–Hg(1)–Cl(2) | 148.13(13) | Cl(3)–Hg(2)–Cl(4)              | 145.51(  |
| N(3)–Hg(1)–N(4)   | 95.9(3)    | N(6)–Hg(2)–N(1) <sup>#1</sup>  | 100.5(3) |
| Cl(1)–Hg(1)–N(3)  | 104.6(2)   | Cl(3)–Hg(2)–N(6)               | 101.0(2) |
| Cl(2)–Hg(1)–N(3)  | 99.4(2)    | Cl(4)–Hg(2)–N(6)               | 102.8(2) |
| Cl(1)–Hg(1)–N(4)  | 99.6(2)    | Cl(3)–Hg(2)–N(1) <sup>#1</sup> | 101.8(2) |
| Cl(2)–Hg(1)–N(4)  | 98.52(19)  | Cl(4)–Hg(2)–N(1) <sup>#1</sup> | 97.9(2)  |

<sup>a</sup> Symmetry code: #1: x, y–1, z

**Table S5.** Anisotropic displacement parameters ( $\text{\AA}^2 \times 10^3$ ) for **1**.  
The anisotropic displacement factor exponent takes the form:  
 $-2 \pi^2 [ h^2 a^{*2} U_{11} + \dots + 2 h k a^* b^* U_{12} ]$

|       | <i>U</i> <sub>11</sub> | <i>U</i> <sub>22</sub> | <i>U</i> <sub>33</sub> | <i>U</i> <sub>23</sub> | <i>U</i> <sub>13</sub> | <i>U</i> <sub>12</sub> |
|-------|------------------------|------------------------|------------------------|------------------------|------------------------|------------------------|
| Hg(1) | 44(1)                  | 52(1)                  | 46(1)                  | 6(1)                   | 15(1)                  | 2(1)                   |
| Hg(2) | 42(1)                  | 41(1)                  | 52(1)                  | -7(1)                  | 17(1)                  | -2(1)                  |
| Cl(1) | 132(3)                 | 82(2)                  | 47(2)                  | 8(2)                   | 18(2)                  | 7(3)                   |
| Cl(2) | 41(1)                  | 69(2)                  | 56(1)                  | 15(2)                  | 27(1)                  | 6(1)                   |
| Cl(3) | 42(1)                  | 63(2)                  | 56(1)                  | -8(1)                  | 14(1)                  | -1(1)                  |
| Cl(4) | 87(2)                  | 58(2)                  | 48(1)                  | -6(2)                  | 24(1)                  | 2(2)                   |
| N(1)  | 34(4)                  | 37(4)                  | 39(4)                  | -2(3)                  | 5(3)                   | -7(3)                  |
| N(2)  | 43(4)                  | 49(6)                  | 48(5)                  | -3(4)                  | 16(4)                  | -3(4)                  |
| N(3)  | 34(4)                  | 45(5)                  | 40(4)                  | 12(4)                  | 4(3)                   | 2(3)                   |
| N(4)  | 37(4)                  | 41(5)                  | 38(4)                  | -9(3)                  | 10(3)                  | -2(3)                  |
| N(5)  | 37(4)                  | 59(6)                  | 62(5)                  | -3(5)                  | 13(4)                  | 14(4)                  |
| N(6)  | 37(4)                  | 43(5)                  | 44(5)                  | -10(4)                 | 15(3)                  | 1(3)                   |
| C(1)  | 36(5)                  | 41(6)                  | 45(5)                  | 2(4)                   | 13(4)                  | 0(4)                   |
| C(2)  | 33(4)                  | 43(5)                  | 40(5)                  | 5(4)                   | 7(4)                   | -2(4)                  |
| C(3)  | 42(5)                  | 43(5)                  | 51(6)                  | -7(5)                  | 10(4)                  | -1(4)                  |
| C(4)  | 36(4)                  | 39(6)                  | 45(5)                  | -2(4)                  | 4(4)                   | -11(4)                 |
| C(5)  | 34(4)                  | 40(5)                  | 44(5)                  | 9(5)                   | 6(4)                   | 5(4)                   |
| C(6)  | 35(4)                  | 38(6)                  | 42(5)                  | 3(4)                   | 10(4)                  | 1(4)                   |
| C(7)  | 35(4)                  | 41(5)                  | 52(5)                  | 16(5)                  | 12(4)                  | 1(5)                   |
| C(8)  | 58(6)                  | 48(6)                  | 55(7)                  | 4(5)                   | 10(5)                  | -12(5)                 |
| C(9)  | 70(7)                  | 56(8)                  | 45(6)                  | -9(6)                  | 23(5)                  | -15(6)                 |
| C(10) | 54(6)                  | 54(7)                  | 47(6)                  | 2(5)                   | 16(5)                  | -12(5)                 |
| C(11) | 31(4)                  | 42(6)                  | 54(6)                  | 6(5)                   | 15(4)                  | 8(4)                   |
| C(12) | 40(5)                  | 48(6)                  | 46(6)                  | 0(5)                   | 17(4)                  | 2(4)                   |
| C(13) | 34(4)                  | 43(6)                  | 36(5)                  | -2(4)                  | 3(4)                   | -3(4)                  |
| C(14) | 46(5)                  | 45(6)                  | 41(5)                  | -5(4)                  | 11(4)                  | -7(4)                  |
| C(15) | 40(5)                  | 40(5)                  | 42(5)                  | -10(4)                 | 0(4)                   | 2(4)                   |
| C(16) | 23(4)                  | 37(5)                  | 49(5)                  | -12(4)                 | 11(3)                  | -4(4)                  |
| C(17) | 34(4)                  | 43(6)                  | 48(6)                  | -5(4)                  | 7(4)                   | -2(4)                  |
| C(18) | 34(4)                  | 47(6)                  | 55(6)                  | -11(5)                 | 10(4)                  | -1(4)                  |
| C(19) | 62(7)                  | 97(11)                 | 64(8)                  | 15(7)                  | 20(6)                  | 37(7)                  |
| C(20) | 80(9)                  | 99(12)                 | 76(9)                  | 21(8)                  | 48(7)                  | 31(8)                  |
| C(21) | 33(5)                  | 59(7)                  | 48(6)                  | -9(5)                  | 16(4)                  | 7(4)                   |
| C(22) | 40(5)                  | 35(5)                  | 39(5)                  | -11(4)                 | 14(4)                  | -1(4)                  |



**Table S6.** Hydrogen coordinates ( $\times 10^4$ ) and isotropic displacement parameters ( $\text{\AA}^2 \times 10^3$ ) for **1**.

|       | x    | y     | z    | $U(\text{eq})$ |
|-------|------|-------|------|----------------|
| H(1)  | 4596 | 5470  | 7422 | 49             |
| H(2)  | 6549 | 4787  | 5446 | 46             |
| H(3)  | 5579 | 3489  | 5282 | 54             |
| H(4)  | 4022 | 3217  | 6197 | 48             |
| H(6)  | 2385 | 3450  | 6727 | 45             |
| H(8)  | 1967 | 4326  | 8949 | 64             |
| H(9)  | 506  | 3900  | 9891 | 67             |
| H(10) | -728 | 2830  | 9435 | 61             |
| H(11) | 767  | 2609  | 7125 | 50             |
| H(12) | 786  | 431   | 7034 | 53             |
| H(13) | -879 | -87   | 9201 | 45             |
| H(14) | 347  | -1203 | 9574 | 53             |
| H(15) | 1829 | -1554 | 8611 | 48             |
| H(17) | 2469 | -379  | 6605 | 50             |
| H(19) | 3458 | -723  | 5519 | 89             |
| H(20) | 4994 | -1038 | 4605 | 100            |
| H(21) | 6329 | -2071 | 5142 | 56             |
| H(22) | 4577 | -2518 | 7266 | 45             |

**Table S7.** Torsion angles [ $^\circ$ ] for **1**.

|                        |           |
|------------------------|-----------|
| Cl(1)-Hg(1)-N(3)-C(10) | 156.0(8)  |
| Cl(2)-Hg(1)-N(3)-C(10) | -2.7(8)   |
| N(4)-Hg(1)-N(3)-C(10)  | -102.4(8) |
| Cl(1)-Hg(1)-N(3)-C(11) | -22.6(7)  |
| Cl(2)-Hg(1)-N(3)-C(11) | 178.7(7)  |
| N(4)-Hg(1)-N(3)-C(11)  | 79.0(7)   |
| Cl(1)-Hg(1)-N(4)-C(12) | 31.1(8)   |
| Cl(2)-Hg(1)-N(4)-C(12) | -175.2(8) |
| N(3)-Hg(1)-N(4)-C(12)  | -74.8(8)  |
| Cl(1)-Hg(1)-N(4)-C(13) | -150.6(7) |
| Cl(2)-Hg(1)-N(4)-C(13) | 3.1(7)    |
| N(3)-Hg(1)-N(4)-C(13)  | 103.5(7)  |

|                         |            |
|-------------------------|------------|
| Cl(3)-Hg(2)-N(6)-C(21)  | -5.6(8)    |
| N(1)#1-Hg(2)-N(6)-C(21) | -110.0(8)  |
| Cl(4)-Hg(2)-N(6)-C(21)  | 149.2(8)   |
| Cl(3)-Hg(2)-N(6)-C(22)  | 172.5(7)   |
| N(1)#1-Hg(2)-N(6)-C(22) | 68.1(8)    |
| Cl(4)-Hg(2)-N(6)-C(22)  | -32.6(8)   |
| C(2)-N(1)-C(1)-C(5)     | -2.7(15)   |
| Hg(2)#2-N(1)-C(1)-C(5)  | -175.4(7)  |
| C(1)-N(1)-C(2)-C(3)     | -0.1(14)   |
| Hg(2)#2-N(1)-C(2)-C(3)  | 173.0(8)   |
| N(1)-C(2)-C(3)-C(4)     | 1.4(15)    |
| C(2)-C(3)-C(4)-C(5)     | -0.1(15)   |
| N(1)-C(1)-C(5)-C(4)     | 4.0(15)    |
| N(1)-C(1)-C(5)-N(2)     | 178.8(9)   |
| C(3)-C(4)-C(5)-C(1)     | -2.5(15)   |
| C(3)-C(4)-C(5)-N(2)     | -176.9(10) |
| C(6)-N(2)-C(5)-C(1)     | 159.9(10)  |
| C(6)-N(2)-C(5)-C(4)     | -25.5(15)  |
| C(5)-N(2)-C(6)-C(7)     | 174.7(9)   |
| N(2)-C(6)-C(7)-C(11)    | -173.7(10) |
| N(2)-C(6)-C(7)-C(8)     | 4.9(16)    |
| C(11)-C(7)-C(8)-C(9)    | 0.2(17)    |
| C(6)-C(7)-C(8)-C(9)     | -178.5(10) |
| C(7)-C(8)-C(9)-C(10)    | 0.8(19)    |
| C(11)-N(3)-C(10)-C(9)   | -0.4(17)   |
| Hg(1)-N(3)-C(10)-C(9)   | -179.0(9)  |
| C(8)-C(9)-C(10)-N(3)    | -1(2)      |
| C(10)-N(3)-C(11)-C(7)   | 1.4(15)    |
| Hg(1)-N(3)-C(11)-C(7)   | -179.9(7)  |
| C(8)-C(7)-C(11)-N(3)    | -1.3(16)   |
| C(6)-C(7)-C(11)-N(3)    | 177.4(9)   |
| C(13)-N(4)-C(12)-C(16)  | 1.4(15)    |
| Hg(1)-N(4)-C(12)-C(16)  | 179.7(7)   |
| C(12)-N(4)-C(13)-C(14)  | 0.0(14)    |
| Hg(1)-N(4)-C(13)-C(14)  | -178.4(7)  |
| N(4)-C(13)-C(14)-C(15)  | -1.2(15)   |
| C(13)-C(14)-C(15)-C(16) | 1.0(14)    |
| N(4)-C(12)-C(16)-C(15)  | -1.4(15)   |
| N(4)-C(12)-C(16)-C(17)  | 178.2(9)   |
| C(14)-C(15)-C(16)-C(12) | 0.2(14)    |
| C(14)-C(15)-C(16)-C(17) | -179.4(9)  |
| C(18)-N(5)-C(17)-C(16)  | -177.9(9)  |
| C(12)-C(16)-C(17)-N(5)  | -171.7(10) |
| C(15)-C(16)-C(17)-N(5)  | 7.9(15)    |
| C(17)-N(5)-C(18)-C(22)  | 166.5(10)  |
| C(17)-N(5)-C(18)-C(19)  | -15.5(18)  |
| C(22)-C(18)-C(19)-C(20) | -2(2)      |
| N(5)-C(18)-C(19)-C(20)  | 179.7(13)  |
| C(18)-C(19)-C(20)-C(21) | 0(2)       |
| C(22)-N(6)-C(21)-C(20)  | -2.5(18)   |
| Hg(2)-N(6)-C(21)-C(20)  | 175.6(11)  |
| C(19)-C(20)-C(21)-N(6)  | 3(2)       |
| C(21)-N(6)-C(22)-C(18)  | -0.6(15)   |
| Hg(2)-N(6)-C(22)-C(18)  | -178.8(7)  |
| C(19)-C(18)-C(22)-N(6)  | 3.0(17)    |
| N(5)-C(18)-C(22)-N(6)   | -178.8(9)  |

---

Symmetry transformations used to generate equivalent atoms:

#1 x,y-1,z #2 x,y+1,z

**Table S8.** Crystal data and structure refinement for **2**.

|                                                     |                                                                                                                                     |
|-----------------------------------------------------|-------------------------------------------------------------------------------------------------------------------------------------|
| Identification code                                 | (2)                                                                                                                                 |
| Empirical formula                                   | C <sub>22</sub> H <sub>18</sub> Br <sub>4</sub> Hg <sub>2</sub> N <sub>6</sub>                                                      |
| Formula weight                                      | 1087.21                                                                                                                             |
| Temperature                                         | 293(2) K                                                                                                                            |
| Wavelength                                          | 0.71073 Å                                                                                                                           |
| Crystal system, space group                         | Triclinic, <i>P</i> $\bar{1}$                                                                                                       |
| Unit cell dimensions                                | $a = 8.2037(16)$ Å $\alpha = 88.07(3)$ [°]<br>$b = 11.926(2)$ Å $\beta = 82.43(3)$ [°]<br>$c = 14.227(3)$ Å $\gamma = 87.89(3)$ [°] |
| Volume                                              | 1378.3(5) Å <sup>3</sup>                                                                                                            |
| Z, Calculated density                               | 2, 2.620 Mg/m <sup>3</sup>                                                                                                          |
| Absorption coefficient                              | 16.945 mm <sup>-1</sup>                                                                                                             |
| F(000)                                              | 984                                                                                                                                 |
| Crystal size                                        | 0.27 × 0.14 × 0.12 mm                                                                                                               |
| Theta range for data collection                     | 1.71 to 29.28 [°]                                                                                                                   |
| Limiting indices                                    | -10 ≤ h ≤ 11, -16 ≤ k ≤ 16, -19 ≤ l ≤ 18                                                                                            |
| Reflections collected / unique                      | 15726 / 7422 [ <i>R</i> (int) = 0.1031]                                                                                             |
| Completeness to theta = 29.28                       | 98.6 %                                                                                                                              |
| Absorption correction                               | Numerical                                                                                                                           |
| Max. and min. transmission                          | 0.132 and 0.071                                                                                                                     |
| Refinement method                                   | Full-matrix least-squares on F <sup>2</sup>                                                                                         |
| Data / restraints / parameters                      | 7422 / 0 / 308                                                                                                                      |
| Goodness-of-fit on F <sup>2</sup>                   | 1.127                                                                                                                               |
| Final <i>R</i> indices [ <i>I</i> > 2σ( <i>I</i> )] | <i>R</i> 1 = 0.0748, <i>wR</i> 2 = 0.1744                                                                                           |
| <i>R</i> indices (all data)                         | <i>R</i> 1 = 0.1123, <i>wR</i> 2 = 0.1947                                                                                           |
| Extinction coefficient                              | 0.0023(3)                                                                                                                           |
| Largest diff. peak and hole                         | 3.391 and -1.936 e.Å <sup>-3</sup>                                                                                                  |

**Table S9.** Atomic coordinates ( $\times 10^4$ ) and equivalent isotropic displacement parameters ( $\text{\AA}^2 \times 10^3$ ) for **2**.  $U(\text{eq})$  is defined as one third of the trace of the orthogonalized  $U_{ij}$  tensor.

|       | x         | y        | z         | $U(\text{eq})$ |
|-------|-----------|----------|-----------|----------------|
| Hg(1) | 1326(1)   | -1731(1) | 7218(1)   | 48(1)          |
| Hg(2) | -2029(1)  | 6412(1)  | 12541(1)  | 49(1)          |
| Br(1) | 3873(2)   | -1851(2) | 8017(1)   | 69(1)          |
| Br(2) | -652(2)   | -2963(1) | 6600(1)   | 54(1)          |
| Br(3) | 109(2)    | 7536(1)  | 13116(1)  | 55(1)          |
| Br(4) | -4604(2)  | 6530(3)  | 11809(2)  | 91(1)          |
| N(1)  | 7307(13)  | 5192(10) | 3883(8)   | 44(2)          |
| N(2)  | 4422(14)  | 1979(10) | 5247(8)   | 46(2)          |
| N(3)  | 2051(14)  | -527(10) | 5891(8)   | 45(2)          |
| N(4)  | -421(15)  | -493(11) | 8222(8)   | 52(3)          |
| N(5)  | 41(19)    | 1892(13) | 9680(9)   | 62(3)          |
| N(6)  | -249(16)  | 5106(10) | 11582(8)  | 48(3)          |
| C(1)  | 6309(15)  | 4318(10) | 3880(9)   | 41(3)          |
| C(2)  | 7993(16)  | 5320(12) | 4697(9)   | 45(3)          |
| C(3)  | 7668(17)  | 4606(13) | 5493(10)  | 49(3)          |
| C(4)  | 6648(16)  | 3733(12) | 5453(9)   | 46(3)          |
| C(5)  | 5943(14)  | 3565(10) | 4660(9)   | 38(2)          |
| C(6)  | 4852(17)  | 2671(10) | 4541(10)  | 44(3)          |
| C(7)  | 3465(16)  | 1022(11) | 5097(9)   | 42(3)          |
| C(8)  | 3139(17)  | 685(12)  | 4220(9)   | 46(3)          |
| C(9)  | 2222(18)  | -266(11) | 4205(9)   | 45(3)          |
| C(10) | 1722(17)  | -851(11) | 5036(10)  | 45(3)          |
| C(11) | 2921(17)  | 394(12)  | 5885(10)  | 47(3)          |
| C(12) | 196(19)   | 327(11)  | 8649(9)   | 46(3)          |
| C(13) | -2050(20) | -598(14) | 8299(10)  | 56(4)          |
| C(14) | -3130(20) | 120(20)  | 8849(12)  | 79(6)          |
| C(15) | -2460(20) | 976(16)  | 9316(12)  | 63(4)          |
| C(16) | -790(20)  | 1073(12) | 9230(9)   | 48(3)          |
| C(17) | -704(18)  | 2697(12) | 10088(9)  | 46(3)          |
| C(18) | 70(20)    | 3521(11) | 10595(9)  | 48(3)          |
| C(19) | 1840(20)  | 3541(14) | 10563(10) | 57(4)          |
| C(20) | 2420(20)  | 4369(16) | 11053(13) | 65(4)          |
| C(21) | 1360(19)  | 5131(14) | 11549(11) | 56(4)          |
| C(22) | -888(17)  | 4323(11) | 11088(9)  | 44(3)          |

**Table S10.** Bond lengths [Å] and angles [°] for **2**.

---

|              |            |
|--------------|------------|
| Hg(1)-N(3)   | 2.358(11)  |
| Hg(1)-N(4)   | 2.392(12)  |
| Hg(1)-Br(2)  | 2.4901(16) |
| Hg(1)-Br(1)  | 2.5045(18) |
| Hg(2)-N(1)#1 | 2.378(11)  |
| Hg(2)-N(6)   | 2.422(13)  |
| Hg(2)-Br(4)  | 2.474(2)   |
| Hg(2)-Br(3)  | 2.4835(16) |
| N(1)-C(1)    | 1.349(15)  |
| N(1)-C(2)    | 1.368(17)  |
| N(1)-Hg(2)#2 | 2.378(11)  |
| N(2)-C(6)    | 1.299(16)  |
| N(2)-C(7)    | 1.446(16)  |
| N(3)-C(11)   | 1.332(17)  |
| N(3)-C(10)   | 1.351(16)  |
| N(4)-C(12)   | 1.318(16)  |
| N(4)-C(13)   | 1.336(19)  |
| N(5)-C(17)   | 1.24(2)    |
| N(5)-C(16)   | 1.424(19)  |
| N(6)-C(21)   | 1.316(19)  |
| N(6)-C(22)   | 1.349(17)  |
| C(1)-C(5)    | 1.411(17)  |
| C(1)-H(1)    | 0.9300     |
| C(2)-C(3)    | 1.396(19)  |
| C(2)-H(2)    | 0.9300     |
| C(3)-C(4)    | 1.366(18)  |
| C(3)-H(3)    | 0.9300     |
| C(4)-C(5)    | 1.359(19)  |
| C(4)-H(4)    | 0.9300     |
| C(5)-C(6)    | 1.446(17)  |
| C(6)-H(6)    | 0.9300     |
| C(7)-C(11)   | 1.361(18)  |
| C(7)-C(8)    | 1.386(18)  |
| C(8)-C(9)    | 1.386(17)  |
| C(8)-H(8)    | 0.9300     |
| C(9)-C(10)   | 1.375(18)  |
| C(9)-H(9)    | 0.9300     |
| C(10)-H(10)  | 0.9300     |
| C(11)-H(11)  | 0.9300     |
| C(12)-C(16)  | 1.40(2)    |
| C(12)-H(12)  | 0.9300     |
| C(13)-C(14)  | 1.39(2)    |
| C(13)-H(13)  | 0.9300     |
| C(14)-C(15)  | 1.40(2)    |
| C(14)-H(14)  | 0.9300     |
| C(15)-C(16)  | 1.37(2)    |
| C(15)-H(15)  | 0.9300     |
| C(17)-C(18)  | 1.452(19)  |
| C(17)-H(17)  | 0.9300     |
| C(18)-C(22)  | 1.368(19)  |
| C(18)-C(19)  | 1.44(2)    |
| C(19)-C(20)  | 1.36(2)    |
| C(19)-H(19)  | 0.9300     |
| C(20)-C(21)  | 1.38(2)    |
| C(20)-H(20)  | 0.9300     |
| C(21)-H(21)  | 0.9300     |

|                    |           |
|--------------------|-----------|
| C(22)-H(22)        | 0.9300    |
| N(3)-Hg(1)-N(4)    | 100.5(4)  |
| N(3)-Hg(1)-Br(2)   | 101.3(3)  |
| N(4)-Hg(1)-Br(2)   | 103.2(3)  |
| N(3)-Hg(1)-Br(1)   | 103.4(3)  |
| N(4)-Hg(1)-Br(1)   | 101.9(3)  |
| Br(2)-Hg(1)-Br(1)  | 140.60(7) |
| N(1)#1-Hg(2)-N(6)  | 97.5(4)   |
| N(1)#1-Hg(2)-Br(4) | 103.1(3)  |
| N(6)-Hg(2)-Br(4)   | 104.8(3)  |
| N(1)#1-Hg(2)-Br(3) | 100.1(3)  |
| N(6)-Hg(2)-Br(3)   | 98.9(3)   |
| Br(4)-Hg(2)-Br(3)  | 144.10(9) |
| C(1)-N(1)-C(2)     | 116.3(11) |
| C(1)-N(1)-Hg(2)#2  | 123.0(9)  |
| C(2)-N(1)-Hg(2)#2  | 120.7(8)  |
| C(6)-N(2)-C(7)     | 119.2(11) |
| C(11)-N(3)-C(10)   | 115.9(12) |
| C(11)-N(3)-Hg(1)   | 125.6(9)  |
| C(10)-N(3)-Hg(1)   | 118.0(8)  |
| C(12)-N(4)-C(13)   | 120.0(14) |
| C(12)-N(4)-Hg(1)   | 120.9(10) |
| C(13)-N(4)-Hg(1)   | 118.9(10) |
| C(17)-N(5)-C(16)   | 122.1(15) |
| C(21)-N(6)-C(22)   | 118.6(13) |
| C(21)-N(6)-Hg(2)   | 120.7(9)  |
| C(22)-N(6)-Hg(2)   | 120.7(10) |
| N(1)-C(1)-C(5)     | 123.7(12) |
| N(1)-C(1)-H(1)     | 118.1     |
| C(5)-C(1)-H(1)     | 118.1     |
| N(1)-C(2)-C(3)     | 122.5(11) |
| N(1)-C(2)-H(2)     | 118.7     |
| C(3)-C(2)-H(2)     | 118.7     |
| C(4)-C(3)-C(2)     | 118.9(12) |
| C(4)-C(3)-H(3)     | 120.6     |
| C(2)-C(3)-H(3)     | 120.6     |
| C(5)-C(4)-C(3)     | 120.9(13) |
| C(5)-C(4)-H(4)     | 119.6     |
| C(3)-C(4)-H(4)     | 119.6     |
| C(4)-C(5)-C(1)     | 117.7(11) |
| C(4)-C(5)-C(6)     | 125.5(12) |
| C(1)-C(5)-C(6)     | 116.9(12) |
| N(2)-C(6)-C(5)     | 119.5(12) |
| N(2)-C(6)-H(6)     | 120.2     |
| C(5)-C(6)-H(6)     | 120.2     |
| C(11)-C(7)-C(8)    | 119.0(12) |
| C(11)-C(7)-N(2)    | 116.0(12) |
| C(8)-C(7)-N(2)     | 124.9(12) |
| C(7)-C(8)-C(9)     | 117.2(12) |
| C(7)-C(8)-H(8)     | 121.4     |
| C(9)-C(8)-H(8)     | 121.4     |
| C(10)-C(9)-C(8)    | 119.9(12) |
| C(10)-C(9)-H(9)    | 120.0     |
| C(8)-C(9)-H(9)     | 120.0     |
| N(3)-C(10)-C(9)    | 122.9(12) |
| N(3)-C(10)-H(10)   | 118.6     |
| C(9)-C(10)-H(10)   | 118.6     |
| N(3)-C(11)-C(7)    | 125.0(13) |
| N(3)-C(11)-H(11)   | 117.5     |
| C(7)-C(11)-H(11)   | 117.5     |

|                   |           |
|-------------------|-----------|
| N(4)-C(12)-C(16)  | 122.5(14) |
| N(4)-C(12)-H(12)  | 118.7     |
| C(16)-C(12)-H(12) | 118.7     |
| N(4)-C(13)-C(14)  | 121.6(15) |
| N(4)-C(13)-H(13)  | 119.2     |
| C(14)-C(13)-H(13) | 119.2     |
| C(13)-C(14)-C(15) | 118.0(16) |
| C(13)-C(14)-H(14) | 121.0     |
| C(15)-C(14)-H(14) | 121.0     |
| C(16)-C(15)-C(14) | 119.7(15) |
| C(16)-C(15)-H(15) | 120.1     |
| C(14)-C(15)-H(15) | 120.1     |
| C(15)-C(16)-C(12) | 118.1(13) |
| C(15)-C(16)-N(5)  | 125.1(14) |
| C(12)-C(16)-N(5)  | 116.9(14) |
| N(5)-C(17)-C(18)  | 124.1(15) |
| N(5)-C(17)-H(17)  | 118.0     |
| C(18)-C(17)-H(17) | 118.0     |
| C(22)-C(18)-C(19) | 119.1(13) |
| C(22)-C(18)-C(17) | 119.2(14) |
| C(19)-C(18)-C(17) | 121.6(13) |
| C(20)-C(19)-C(18) | 116.0(15) |
| C(20)-C(19)-H(19) | 122.0     |
| C(18)-C(19)-H(19) | 122.0     |
| C(19)-C(20)-C(21) | 121.2(16) |
| C(19)-C(20)-H(20) | 119.4     |
| C(21)-C(20)-H(20) | 119.4     |
| N(6)-C(21)-C(20)  | 122.7(14) |
| N(6)-C(21)-H(21)  | 118.6     |
| C(20)-C(21)-H(21) | 118.6     |
| N(6)-C(22)-C(18)  | 122.3(14) |
| N(6)-C(22)-H(22)  | 118.9     |
| C(18)-C(22)-H(22) | 118.9     |

---

Symmetry transformations used to generate equivalent atoms:

#1  $x-1, y, z+1$  #2  $x+1, y, z-1$

**Table S11.** Selected bond length (Å) and bond angles (°) for **2**<sup>a</sup>

|                   |           |                          |           |
|-------------------|-----------|--------------------------|-----------|
| Hg(1)–N(3)        | 2.358(1)  | Hg(2)–N(1) <sup>#1</sup> | 2.378(1)  |
| Hg(1)–N(4)        | 2.392(1)  | Hg(2)–N(6)               | 2.422(1)  |
| Hg(1)–Br(1)       | 2.5045(1) | Hg(2)–Br(3)              | 2.4835(1) |
| Hg(1)–Br(2)       | 2.4901(1) | Hg(2)–Br(4)              | 2.474(2)  |
| C(6)–N(2)         | 1.299(1)  | C(17)–N(5)               | 1.24(2)   |
| Br(1)–Hg(1)–Br(2) | 140.60(1) | Br(3)–Hg(2)–Br(4)        | 144.10(1) |
| N(3)–Hg(1)–N(4)   | 100.5(4)  | N(6)–Hg(2)–N(5)          | 97.5(4)   |
| Br(1)–Hg(1)–N(3)  | 103.4(3)  | Br(3)–Hg(2)–N(5)         | 98.9(3)   |
| Br(2)–Hg(1)–N(3)  | 101.3(3)  | Br(4)–Hg(2)–N(5)         | 104.8(3)  |
| Br(1)–Hg(1)–N(4)  | 101.9(3)  | Br(3)–Hg(2)–N(6)         | 100.1(3)  |
| Br(2)–Hg(1)–N(4)  | 103.2(3)  | Br(4)–Hg(2)–N(6)         | 103.1(3)  |

<sup>a</sup>Symmetry code: #1: x-1,y,z+1

**Table S12.** Anisotropic displacement parameters (Å<sup>2</sup> × 10<sup>3</sup>) for **2**.

The anisotropic displacement factor exponent takes the form:

$$-2 \pi^2 [ h^2 a^{*2} U_{11} + \dots + 2 h k a^* b^* U_{12} ]$$

|       | U11   | U22     | U33    | U23     | U13    | U12    |
|-------|-------|---------|--------|---------|--------|--------|
| Hg(1) | 55(1) | 48(1)   | 41(1)  | -5(1)   | -1(1)  | -15(1) |
| Hg(2) | 50(1) | 50(1)   | 49(1)  | -4(1)   | -6(1)  | -13(1) |
| Br(1) | 54(1) | 103(1)  | 53(1)  | -7(1)   | -7(1)  | -24(1) |
| Br(2) | 61(1) | 44(1)   | 59(1)  | -6(1)   | -11(1) | -14(1) |
| Br(3) | 64(1) | 45(1)   | 60(1)  | -3(1)   | -14(1) | -19(1) |
| Br(4) | 51(1) | 152(2)  | 73(1)  | 4(1)    | -14(1) | -12(1) |
| N(1)  | 36(5) | 44(6)   | 47(6)  | -3(5)   | 8(4)   | -5(5)  |
| N(2)  | 44(6) | 45(6)   | 47(6)  | -4(5)   | -2(5)  | -4(5)  |
| N(3)  | 52(6) | 42(6)   | 39(5)  | -2(4)   | -1(4)  | -6(5)  |
| N(4)  | 49(6) | 59(7)   | 45(6)  | -8(5)   | 5(5)   | -15(6) |
| N(5)  | 75(9) | 63(8)   | 48(7)  | -15(6)  | -10(6) | 7(7)   |
| N(6)  | 62(7) | 40(6)   | 42(6)  | 2(5)    | -6(5)  | -6(5)  |
| C(1)  | 35(6) | 36(6)   | 50(7)  | 4(5)    | 1(5)   | -10(5) |
| C(2)  | 39(6) | 48(7)   | 51(7)  | -7(6)   | -8(5)  | -18(6) |
| C(3)  | 46(7) | 56(8)   | 45(7)  | -3(6)   | -6(5)  | -7(6)  |
| C(4)  | 42(7) | 50(7)   | 41(6)  | 2(5)    | 10(5)  | -13(6) |
| C(5)  | 33(6) | 35(6)   | 44(6)  | -5(5)   | 6(5)   | 1(5)   |
| C(6)  | 56(8) | 31(6)   | 44(7)  | 2(5)    | -4(5)  | -5(6)  |
| C(7)  | 41(6) | 43(7)   | 41(6)  | -5(5)   | 4(5)   | -6(6)  |
| C(8)  | 49(7) | 47(7)   | 43(7)  | 9(5)    | -9(5)  | -14(6) |
| C(9)  | 59(8) | 36(6)   | 42(6)  | 1(5)    | -5(6)  | -14(6) |
| C(10) | 47(7) | 39(6)   | 51(7)  | -3(5)   | -10(5) | -7(6)  |
| C(11) | 45(7) | 44(7)   | 50(7)  | -3(6)   | -1(5)  | -2(6)  |
| C(12) | 63(8) | 38(6)   | 38(6)  | -5(5)   | -8(6)  | -12(6) |
| C(13) | 63(9) | 60(9)   | 45(7)  | -7(6)   | -13(6) | 0(8)   |
| C(14) | 51(9) | 129(18) | 59(10) | -39(11) | -1(7)  | -9(10) |
| C(15) | 49(8) | 72(11)  | 69(10) | -37(9)  | -6(7)  | 11(8)  |
| C(16) | 69(9) | 42(7)   | 34(6)  | -8(5)   | -7(6)  | -4(7)  |



---

|       |       |        |        |        |       |        |
|-------|-------|--------|--------|--------|-------|--------|
| C(17) | 46(7) | 46(7)  | 43(7)  | -5(5)  | 6(5)  | -7(6)  |
| C(18) | 67(9) | 37(6)  | 39(6)  | 0(5)   | 0(6)  | -6(6)  |
| C(19) | 64(9) | 61(9)  | 44(7)  | -8(6)  | 8(6)  | -1(8)  |
| C(20) | 48(8) | 69(11) | 76(11) | -14(9) | -4(7) | -4(8)  |
| C(21) | 53(8) | 61(9)  | 56(8)  | -19(7) | -7(6) | -13(7) |
| C(22) | 44(7) | 39(6)  | 45(7)  | -7(5)  | 9(5)  | -9(6)  |

---

**Table S13.** Hydrogen coordinates ( $\times 10^4$ ) and isotropic displacement parameters ( $\text{\AA}^2 \times 10^3$ ) for **2**.

---

|       | x     | y     | z     | $U(\text{eq})$ |
|-------|-------|-------|-------|----------------|
| H(1)  | 5836  | 4205  | 3333  | 49             |
| H(2)  | 8704  | 5904  | 4722  | 54             |
| H(3)  | 8137  | 4723  | 6040  | 58             |
| H(4)  | 6434  | 3248  | 5977  | 55             |
| H(6)  | 4462  | 2591  | 3963  | 53             |
| H(8)  | 3520  | 1081  | 3664  | 55             |
| H(9)  | 1946  | -508  | 3633  | 54             |
| H(10) | 1131  | -1497 | 5009  | 54             |
| H(11) | 3178  | 627   | 6464  | 56             |
| H(12) | 1329  | 410   | 8559  | 55             |
| H(13) | -2470 | -1164 | 7976  | 67             |
| H(14) | -4261 | 33    | 8905  | 95             |
| H(15) | -3149 | 1475  | 9683  | 76             |
| H(17) | -1831 | 2778  | 10069 | 55             |
| H(19) | 2535  | 3020  | 10228 | 69             |
| H(20) | 3544  | 4421  | 11053 | 78             |
| H(21) | 1803  | 5685  | 11873 | 67             |
| H(22) | -2021 | 4328  | 11082 | 53             |

---

**Table S14.** Torsion angles [°] for **2**.

---

|                         |            |
|-------------------------|------------|
| N(4)-Hg(1)-N(3)-C(11)   | 64.5(12)   |
| Br(2)-Hg(1)-N(3)-C(11)  | 170.4(11)  |
| Br(1)-Hg(1)-N(3)-C(11)  | -40.5(12)  |
| N(4)-Hg(1)-N(3)-C(10)   | -123.2(10) |
| Br(2)-Hg(1)-N(3)-C(10)  | -17.3(11)  |
| Br(1)-Hg(1)-N(3)-C(10)  | 131.7(10)  |
| N(3)-Hg(1)-N(4)-C(12)   | -72.6(11)  |
| Br(2)-Hg(1)-N(4)-C(12)  | -176.9(10) |
| Br(1)-Hg(1)-N(4)-C(12)  | 33.7(11)   |
| N(3)-Hg(1)-N(4)-C(13)   | 103.2(11)  |
| Br(2)-Hg(1)-N(4)-C(13)  | -1.1(12)   |
| Br(1)-Hg(1)-N(4)-C(13)  | -150.5(11) |
| N(1)#1-Hg(2)-N(6)-C(21) | -98.1(12)  |
| Br(4)-Hg(2)-N(6)-C(21)  | 156.2(11)  |
| Br(3)-Hg(2)-N(6)-C(21)  | 3.4(12)    |
| N(1)#1-Hg(2)-N(6)-C(22) | 80.4(10)   |
| Br(4)-Hg(2)-N(6)-C(22)  | -25.3(10)  |
| Br(3)-Hg(2)-N(6)-C(22)  | -178.1(9)  |
| C(2)-N(1)-C(1)-C(5)     | 0.8(19)    |
| Hg(2)#2-N(1)-C(1)-C(5)  | 177.9(9)   |
| C(1)-N(1)-C(2)-C(3)     | -1(2)      |
| Hg(2)#2-N(1)-C(2)-C(3)  | -178.4(11) |
| N(1)-C(2)-C(3)-C(4)     | 1(2)       |
| C(2)-C(3)-C(4)-C(5)     | -1(2)      |
| C(3)-C(4)-C(5)-C(1)     | 0(2)       |
| C(3)-C(4)-C(5)-C(6)     | 179.8(14)  |
| N(1)-C(1)-C(5)-C(4)     | 0(2)       |
| N(1)-C(1)-C(5)-C(6)     | -179.9(13) |
| C(7)-N(2)-C(6)-C(5)     | -174.0(12) |
| C(4)-C(5)-C(6)-N(2)     | 3(2)       |
| C(1)-C(5)-C(6)-N(2)     | -177.4(13) |
| C(6)-N(2)-C(7)-C(11)    | -173.8(13) |
| C(6)-N(2)-C(7)-C(8)     | 9(2)       |
| C(11)-C(7)-C(8)-C(9)    | 2(2)       |
| N(2)-C(7)-C(8)-C(9)     | 178.9(14)  |
| C(7)-C(8)-C(9)-C(10)    | -2(2)      |
| C(11)-N(3)-C(10)-C(9)   | -1(2)      |
| Hg(1)-N(3)-C(10)-C(9)   | -174.0(11) |
| C(8)-C(9)-C(10)-N(3)    | 2(2)       |
| C(10)-N(3)-C(11)-C(7)   | 1(2)       |
| Hg(1)-N(3)-C(11)-C(7)   | 173.4(11)  |
| C(8)-C(7)-C(11)-N(3)    | -2(2)      |
| N(2)-C(7)-C(11)-N(3)    | -178.7(13) |
| C(13)-N(4)-C(12)-C(16)  | 3(2)       |
| Hg(1)-N(4)-C(12)-C(16)  | 179.2(10)  |
| C(12)-N(4)-C(13)-C(14)  | -2(2)      |
| Hg(1)-N(4)-C(13)-C(14)  | -178.0(14) |
| N(4)-C(13)-C(14)-C(15)  | 1(3)       |
| C(13)-C(14)-C(15)-C(16) | -1(3)      |
| C(14)-C(15)-C(16)-C(12) | 2(3)       |
| C(14)-C(15)-C(16)-N(5)  | -179.0(17) |
| N(4)-C(12)-C(16)-C(15)  | -3(2)      |
| N(4)-C(12)-C(16)-N(5)   | 177.5(13)  |
| C(17)-N(5)-C(16)-C(15)  | -10(2)     |

|                         |            |
|-------------------------|------------|
| C(17)-N(5)-C(16)-C(12)  | 168.6(14)  |
| C(16)-N(5)-C(17)-C(18)  | 176.9(12)  |
| N(5)-C(17)-C(18)-C(22)  | -174.6(15) |
| N(5)-C(17)-C(18)-C(19)  | 8(2)       |
| C(22)-C(18)-C(19)-C(20) | 1(2)       |
| C(17)-C(18)-C(19)-C(20) | 178.8(14)  |
| C(18)-C(19)-C(20)-C(21) | 0(3)       |
| C(22)-N(6)-C(21)-C(20)  | -2(2)      |
| Hg(2)-N(6)-C(21)-C(20)  | 176.6(13)  |
| C(19)-C(20)-C(21)-N(6)  | 0(3)       |
| C(21)-N(6)-C(22)-C(18)  | 3(2)       |
| Hg(2)-N(6)-C(22)-C(18)  | -175.2(10) |
| C(19)-C(18)-C(22)-N(6)  | -3(2)      |
| C(17)-C(18)-C(22)-N(6)  | 179.3(12)  |

---

Symmetry transformations used to generate equivalent atoms:

#1  $x-1, y, z+1$  #2  $x+1, y, z-1$

**Table S15.** Crystal data and structure refinement for **3**.

|                                                     |                                                                                                                                        |
|-----------------------------------------------------|----------------------------------------------------------------------------------------------------------------------------------------|
| Identification code                                 | (3)                                                                                                                                    |
| Empirical formula                                   | C <sub>11</sub> H <sub>9</sub> HgI <sub>2</sub> N <sub>3</sub>                                                                         |
| Formula weight                                      | 637.60                                                                                                                                 |
| Temperature                                         | 293(2) K                                                                                                                               |
| Wavelength                                          | 0.71073 Å                                                                                                                              |
| Crystal system, space group                         | Monoclinic, <i>P</i> <sub>2</sub> <sub>1</sub> / <i>n</i>                                                                              |
| Unit cell dimensions                                | <i>a</i> = 8.6931(17) Å    alpha = 90 [°]<br><i>b</i> = 12.727(3) Å    beta = 93.54(3) [°]<br><i>c</i> = 13.158(3) Å    gamma = 90 [°] |
| Volume                                              | 1453.0(6) Å <sup>3</sup>                                                                                                               |
| Z, Calculated density                               | 4, 2.915 Mg/m <sup>3</sup>                                                                                                             |
| Absorption coefficient                              | 14.825 mm <sup>-1</sup>                                                                                                                |
| F(000)                                              | 1128                                                                                                                                   |
| Crystal size                                        | 0.12 × 0.12 × 0.10 mm                                                                                                                  |
| Theta range for data collection                     | 2.23 to 29.23 [°]                                                                                                                      |
| Limiting indices                                    | -11 ≤ <i>h</i> ≤ 11, -17 ≤ <i>k</i> ≤ 17, -17 ≤ <i>l</i> ≤ 18                                                                          |
| Reflections collected / unique                      | 11016 / 3909 [ <i>R</i> (int) = 0.0893]                                                                                                |
| Completeness to theta = 29.23                       | 99.2 %                                                                                                                                 |
| Absorption correction                               | Numerical                                                                                                                              |
| Max. and min. transmission                          | 0.225 and 0.193                                                                                                                        |
| Refinement method                                   | Full-matrix least-squares on F <sup>2</sup>                                                                                            |
| Data / restraints / parameters                      | 3909 / 0 / 155                                                                                                                         |
| Goodness-of-fit on F <sup>2</sup>                   | 1.172                                                                                                                                  |
| Final <i>R</i> indices [ <i>I</i> > 2σ( <i>I</i> )] | <i>R</i> 1 = 0.0793, <i>wR</i> 2 = 0.1845                                                                                              |
| <i>R</i> indices (all data)                         | <i>R</i> 1 = 0.1007, <i>wR</i> 2 = 0.1978                                                                                              |
| Extinction coefficient                              | 0.0022(4)                                                                                                                              |
| Largest diff. peak and hole                         | 4.112 and -5.039 e.Å <sup>-3</sup>                                                                                                     |

**Table S16.** Atomic coordinates ( $\times 10^4$ ) and equivalent isotropic displacement parameters ( $\text{\AA}^2 \times 10^3$ ) for **3**.  $U(\text{eq})$  is defined as one third of the trace of the orthogonalized  $U_{ij}$  tensor.

|       | x        | y        | z         | $U(\text{eq})$ |
|-------|----------|----------|-----------|----------------|
| Hg(1) | 2532(1)  | 7273(1)  | 3589(1)   | 48(1)          |
| I(1)  | 4675(1)  | 7436(1)  | 2248(1)   | 60(1)          |
| I(2)  | -218(1)  | 6412(1)  | 3691(1)   | 79(1)          |
| N(3)  | 3998(13) | 6561(9)  | 5073(8)   | 48(2)          |
| C(11) | 3369(17) | 6307(12) | 5931(11)  | 54(3)          |
| C(10) | 5528(15) | 6342(10) | 5054(9)   | 42(2)          |
| N(2)  | 3908(14) | 5298(11) | 8479(9)   | 54(3)          |
| C(7)  | 4083(15) | 5886(10) | 6771(10)  | 46(3)          |
| C(6)  | 3268(18) | 5677(13) | 7700(10)  | 53(3)          |
| C(9)  | 6375(15) | 5925(12) | 5854(12)  | 52(3)          |
| C(8)  | 5664(15) | 5696(11) | 6711(11)  | 48(3)          |
| C(1)  | 3131(16) | 4184(11) | 9830(10)  | 46(3)          |
| C(5)  | 3067(14) | 5160(11) | 9341(10)  | 46(3)          |
| C(4)  | 2249(19) | 5982(11) | 9752(11)  | 55(3)          |
| N(1)  | 2382(11) | 3998(8)  | 10662(8)  | 41(2)          |
| C(2)  | 1581(15) | 4767(11) | 11077(11) | 49(3)          |
| C(3)  | 1533(19) | 5765(13) | 10661(12) | 59(4)          |

**Table S17.** Bond lengths [Å] and angles [°] for **3**.

---

|                   |            |
|-------------------|------------|
| Hg(1)-N(1)#1      | 2.405(10)  |
| Hg(1)-N(3)        | 2.440(12)  |
| Hg(1)-I(2)        | 2.6404(12) |
| Hg(1)-I(1)        | 2.6518(12) |
| N(3)-C(11)        | 1.325(17)  |
| N(3)-C(10)        | 1.360(17)  |
| C(11)-C(7)        | 1.34(2)    |
| C(11)-H(11)       | 0.9300     |
| C(10)-C(9)        | 1.35(2)    |
| C(10)-H(10)       | 0.9300     |
| N(2)-C(6)         | 1.234(18)  |
| N(2)-C(5)         | 1.397(16)  |
| C(7)-C(8)         | 1.402(18)  |
| C(7)-C(6)         | 1.475(17)  |
| C(6)-H(6)         | 0.9300     |
| C(9)-C(8)         | 1.351(19)  |
| C(9)-H(9)         | 0.9300     |
| C(8)-H(8)         | 0.9300     |
| C(1)-N(1)         | 1.329(14)  |
| C(1)-C(5)         | 1.399(18)  |
| C(1)-H(1)         | 0.9300     |
| C(5)-C(4)         | 1.392(19)  |
| C(4)-C(3)         | 1.409(19)  |
| C(4)-H(4)         | 0.9300     |
| N(1)-C(2)         | 1.338(16)  |
| N(1)-Hg(1)#2      | 2.405(10)  |
| C(2)-C(3)         | 1.38(2)    |
| C(2)-H(2)         | 0.9300     |
| C(3)-H(3)         | 0.9300     |
| N(1)#1-Hg(1)-N(3) | 90.5(4)    |
| N(1)#1-Hg(1)-I(2) | 111.3(2)   |
| N(3)-Hg(1)-I(2)   | 103.6(3)   |
| N(1)#1-Hg(1)-I(1) | 101.3(2)   |
| N(3)-Hg(1)-I(1)   | 102.0(3)   |
| I(2)-Hg(1)-I(1)   | 137.87(5)  |
| C(11)-N(3)-C(10)  | 114.9(11)  |
| C(11)-N(3)-Hg(1)  | 123.3(9)   |
| C(10)-N(3)-Hg(1)  | 121.7(8)   |
| N(3)-C(11)-C(7)   | 127.1(13)  |
| N(3)-C(11)-H(11)  | 116.4      |
| C(7)-C(11)-H(11)  | 116.4      |
| C(9)-C(10)-N(3)   | 123.5(11)  |
| C(9)-C(10)-H(10)  | 118.3      |
| N(3)-C(10)-H(10)  | 118.3      |
| C(6)-N(2)-C(5)    | 119.4(12)  |
| C(11)-C(7)-C(8)   | 115.3(12)  |
| C(11)-C(7)-C(6)   | 122.1(12)  |
| C(8)-C(7)-C(6)    | 122.5(12)  |

|                   |           |
|-------------------|-----------|
| N(2)-C(6)-C(7)    | 123.0(13) |
| N(2)-C(6)-H(6)    | 118.5     |
| C(7)-C(6)-H(6)    | 118.5     |
| C(8)-C(9)-C(10)   | 118.6(12) |
| C(8)-C(9)-H(9)    | 120.7     |
| C(10)-C(9)-H(9)   | 120.7     |
| C(9)-C(8)-C(7)    | 120.6(13) |
| C(9)-C(8)-H(8)    | 119.7     |
| C(7)-C(8)-H(8)    | 119.7     |
| N(1)-C(1)-C(5)    | 122.0(12) |
| N(1)-C(1)-H(1)    | 119.0     |
| C(5)-C(1)-H(1)    | 119.0     |
| C(4)-C(5)-N(2)    | 121.7(13) |
| C(4)-C(5)-C(1)    | 119.7(12) |
| N(2)-C(5)-C(1)    | 118.5(12) |
| C(5)-C(4)-C(3)    | 116.5(13) |
| C(5)-C(4)-H(4)    | 121.8     |
| C(3)-C(4)-H(4)    | 121.8     |
| C(1)-N(1)-C(2)    | 120.0(11) |
| C(1)-N(1)-Hg(1)#2 | 119.7(8)  |
| C(2)-N(1)-Hg(1)#2 | 120.3(8)  |
| N(1)-C(2)-C(3)    | 121.0(12) |
| N(1)-C(2)-H(2)    | 119.5     |
| C(3)-C(2)-H(2)    | 119.5     |
| C(2)-C(3)-C(4)    | 120.8(13) |
| C(2)-C(3)-H(3)    | 119.6     |
| C(4)-C(3)-H(3)    | 119.6     |

---

Symmetry transformations used to generate equivalent atoms:  
#1  $-x+1/2, y+1/2, -z+3/2$  #2  $-x+1/2, y-1/2, -z+3/2$

**Table S18.** Selected bond length (Å) and bond angles (°) for **3**<sup>a</sup>

|                               |           |                          |           |
|-------------------------------|-----------|--------------------------|-----------|
| Hg(1)–N(3)                    | 2.440(12) | Hg(1)–N(1) <sup>#1</sup> | 2.405(1)  |
| Hg(1)–I(1)                    | 2.6518(1) | Hg(1)–I(2)               | 2.6404(1) |
| C(6)–N(2)                     | 1.234(18) | C(5)–N(2)                | 1.397(1)  |
| I(1)–Hg(1)–I(2)               | 137.87(5) | N(3)–Hg(1)–I(1)          | 90.5(4)   |
| N(3)–Hg(1)–I(1)               | 102.0(3)  | N(3)–Hg(1)–I(2)          | 103.6(3)  |
| I(1)–Hg(1)–N(1) <sup>#1</sup> | 101.3(2)  | I(2)–Hg(1)–N(1)          | 111.3(2)  |

<sup>a</sup> Symmetry code: #1: -x+1/2, y+1/2, -z+3/2.

**Table S19.** Anisotropic displacement parameters (Å<sup>2</sup> × 10<sup>3</sup>) for **3**.

The anisotropic displacement factor exponent takes the form:

$$-2 \pi^2 [ h^2 a^{*2} U_{11} + \dots + 2 h k a^* b^* U_{12} ]$$

|       | <i>U</i> <sub>11</sub> | <i>U</i> <sub>22</sub> | <i>U</i> <sub>33</sub> | <i>U</i> <sub>23</sub> | <i>U</i> <sub>13</sub> | <i>U</i> <sub>12</sub> |
|-------|------------------------|------------------------|------------------------|------------------------|------------------------|------------------------|
| Hg(1) | 47(1)                  | 54(1)                  | 43(1)                  | 1(1)                   | 15(1)                  | -1(1)                  |
| I(1)  | 60(1)                  | 72(1)                  | 52(1)                  | -4(1)                  | 28(1)                  | -3(1)                  |
| I(2)  | 51(1)                  | 79(1)                  | 110(1)                 | -3(1)                  | 27(1)                  | -13(1)                 |
| N(3)  | 49(6)                  | 53(6)                  | 43(6)                  | 1(5)                   | 9(5)                   | 4(5)                   |
| C(11) | 49(7)                  | 64(8)                  | 52(7)                  | 14(6)                  | 15(6)                  | 24(6)                  |
| C(10) | 48(6)                  | 46(6)                  | 34(6)                  | -3(5)                  | 7(5)                   | -4(5)                  |
| N(2)  | 51(6)                  | 70(7)                  | 42(6)                  | 5(5)                   | 15(5)                  | 0(6)                   |
| C(7)  | 43(6)                  | 49(6)                  | 46(6)                  | 2(5)                   | 3(5)                   | 4(5)                   |
| C(6)  | 60(8)                  | 67(8)                  | 32(6)                  | 8(6)                   | 11(5)                  | 13(6)                  |
| C(9)  | 37(6)                  | 60(8)                  | 58(8)                  | -6(6)                  | 1(5)                   | 0(5)                   |
| C(8)  | 44(6)                  | 53(7)                  | 48(7)                  | -10(6)                 | 0(5)                   | 1(5)                   |
| C(1)  | 52(7)                  | 50(6)                  | 37(6)                  | 5(5)                   | 17(5)                  | 8(5)                   |
| C(5)  | 38(6)                  | 51(6)                  | 48(7)                  | 3(5)                   | 6(5)                   | -2(5)                  |
| C(4)  | 74(9)                  | 45(6)                  | 46(7)                  | 0(5)                   | 9(7)                   | 5(6)                   |
| N(1)  | 37(5)                  | 45(5)                  | 43(5)                  | 2(4)                   | 11(4)                  | -2(4)                  |
| C(2)  | 44(6)                  | 57(7)                  | 46(7)                  | -11(6)                 | 12(5)                  | -3(5)                  |
| C(3)  | 65(9)                  | 63(8)                  | 52(8)                  | -3(7)                  | 18(7)                  | 13(7)                  |



**Table S20.** Hydrogen coordinates ( $\times 10^4$ ) and isotropic displacement parameters ( $\text{\AA}^2 \times 10^3$ ) for **3**.

|       | x    | y    | z     | $U(\text{eq})$ |
|-------|------|------|-------|----------------|
| H(11) | 2318 | 6433 | 5955  | 65             |
| H(10) | 6017 | 6485 | 4461  | 51             |
| H(6)  | 2224 | 5837 | 7698  | 63             |
| H(9)  | 7423 | 5798 | 5813  | 62             |
| H(8)  | 6229 | 5411 | 7268  | 58             |
| H(1)  | 3716 | 3649 | 9565  | 55             |
| H(4)  | 2178 | 6638 | 9443  | 66             |
| H(2)  | 1048 | 4629 | 11654 | 58             |
| H(3)  | 1022 | 6300 | 10985 | 71             |

**Table S21.** Torsion angles [°] for **3**.

---

|                         |            |
|-------------------------|------------|
| N(1)#1-Hg(1)-N(3)-C(11) | 81.2(12)   |
| I(2)-Hg(1)-N(3)-C(11)   | -30.9(12)  |
| I(1)-Hg(1)-N(3)-C(11)   | -177.1(11) |
| N(1)#1-Hg(1)-N(3)-C(10) | -102.5(10) |
| I(2)-Hg(1)-N(3)-C(10)   | 145.4(9)   |
| I(1)-Hg(1)-N(3)-C(10)   | -0.8(10)   |
| C(10)-N(3)-C(11)-C(7)   | 2(2)       |
| Hg(1)-N(3)-C(11)-C(7)   | 178.1(12)  |
| C(11)-N(3)-C(10)-C(9)   | -2(2)      |
| Hg(1)-N(3)-C(10)-C(9)   | -178.5(10) |
| N(3)-C(11)-C(7)-C(8)    | 0(2)       |
| N(3)-C(11)-C(7)-C(6)    | 177.4(15)  |
| C(5)-N(2)-C(6)-C(7)     | 177.6(14)  |
| C(11)-C(7)-C(6)-N(2)    | -179.5(16) |
| C(8)-C(7)-C(6)-N(2)     | -2(2)      |
| N(3)-C(10)-C(9)-C(8)    | 1(2)       |
| C(10)-C(9)-C(8)-C(7)    | 0(2)       |
| C(11)-C(7)-C(8)-C(9)    | 0(2)       |
| C(6)-C(7)-C(8)-C(9)     | -178.3(14) |
| C(6)-N(2)-C(5)-C(4)     | -53(2)     |
| C(6)-N(2)-C(5)-C(1)     | 130.6(17)  |
| N(1)-C(1)-C(5)-C(4)     | 3(2)       |
| N(1)-C(1)-C(5)-N(2)     | 179.0(12)  |
| N(2)-C(5)-C(4)-C(3)     | -175.8(14) |
| C(1)-C(5)-C(4)-C(3)     | 0(2)       |
| C(5)-C(1)-N(1)-C(2)     | -2(2)      |
| C(5)-C(1)-N(1)-Hg(1)#2  | 177.3(11)  |
| C(1)-N(1)-C(2)-C(3)     | -1(2)      |
| Hg(1)#2-N(1)-C(2)-C(3)  | 179.3(12)  |
| N(1)-C(2)-C(3)-C(4)     | 4(2)       |
| C(5)-C(4)-C(3)-C(2)     | -4(2)      |

---

Symmetry transformations used to generate equivalent atoms:

#1 -x+1/2,y+1/2,-z+3/2 #2 -x+1/2,y-1/2,-z+3/2
